# Supplementary material
Source: MDPI journal article supplement (https://www.mdpi.com/2073-4433/13/3/436)
Supplement: s1 [file s1]

## Supplementary Materials:

Edward Hanna <sup>1,\*</sup>, Thomas E. Cropper <sup>2</sup>, Richard J. Hall <sup>3</sup>, Richard C. Cornes <sup>2</sup> and Mariano Barriendos <sup>4</sup>

**Table S1.** v2 (20CRv3) reanalysis and observations seasonal mean MSLP series for 1806-1850. Red highlighted are cases where 20CRv3 is superior.

| Correlation | DJF           | MAM           | JJA           | SON           |
|-------------|---------------|---------------|---------------|---------------|
| SW Iceland  | 0.876 (0.550) | 0.902 (0.233) | 0.852 (0.500) | 0.805 (0.488) |
| Gibraltar   | 0.659 (0.375) | 0.594 (0.051) | 0.094 (0.544) | 0.616 (0.634) |
| London      | 0.977 (0.890) | 0.976 (0.758) | 0.894 (0.503) | 0.964 (0.871) |
| Paris       | 0.973 (0.885) | 0.972 (0.673) | 0.886 (0.464) | 0.963 (0.886) |
| RMSE        | DJF           | MAM           | JJA           | SON           |
| SW Iceland  | 3.79 (6.82)   | 2.97 (5.95)   | 2.32 (3.78)   | 2.40 (4.61)   |
| Gibraltar   | 4.13 (3.54)   | 2.05 (2.41)   | 1.34 (3.15)   | 2.28 (2.74)   |
| London      | 0.85 (1.44)   | 2.38 (1.88)   | 1.25 (1.82)   | 0.92 (1.27)   |
| Paris       | 0.84 (1.65)   | 1.51 (1.76)   | 0.75 (1.22)   | 0.59 (1.01)   |
| MAE         | DJF           | MAM           | JJA           | SON           |
| SW Iceland  | 3.06 (5.57)   | 2.41 (5.17)   | 1.52 (3.06)   | 1.22 (3.62)   |
| Gibraltar   | 3.39 (2.92)   | 1.57 (2.14)   | 1.18 (2.98)   | 1.86 (2.43)   |
| London      | 0.67 (1.15)   | 2.28 (1.44)   | 1.04 (1.50)   | 0.75 (1.09)   |
| Paris       | 0.66 (1.26)   | 1.41 (1.43)   | 0.61 (1.01)   | 0.48 (0.83)   |

**Table S2.** De-trended correlation coefficients between seasonal NAO<sub>Fixed</sub> and NAO<sub>PC</sub> indices for various periods. Both NAO indices are calculated from EKF400v2 and ERA5 reanalysis data spliced together, as discussed in the main text. The shaded value is \*not\* statistically significant at the  $p \leq 0.05$  level.

| Period    | DJF  | MAM  | JJA  | SON  |
|-----------|------|------|------|------|
| 1801-1850 | 0.95 | 0.92 | 0.82 | 0.91 |
| 1851-1900 | 0.95 | 0.86 | 0.70 | 0.82 |
| 1901-1950 | 0.91 | 0.92 | 0.74 | 0.78 |
| 1951-2000 | 0.92 | 0.84 | 0.49 | 0.77 |
| 1951-1980 | 0.91 | 0.86 | 0.54 | 0.91 |
| 1961-1990 | 0.93 | 0.81 | 0.56 | 0.84 |
| 1971-2000 | 0.94 | 0.83 | 0.33 | 0.65 |
| 1981-2010 | 0.94 | 0.88 | 0.52 | 0.63 |
| 1991-2020 | 0.93 | 0.91 | 0.65 | 0.61 |

**Table S3.** De-trended correlation coefficients between seasonal GB<sub>1</sub> and GB<sub>2</sub> indices for various periods.

| Period    | DJF  | MAM  | JJA  | SON  |
|-----------|------|------|------|------|
| 1801-1850 | 0.96 | 0.97 | 0.84 | 0.95 |
| 1851-1900 | 0.96 | 0.95 | 0.88 | 0.95 |
| 1901-1950 | 0.94 | 0.97 | 0.94 | 0.94 |
| 1951-2000 | 0.93 | 0.88 | 0.90 | 0.90 |
| 1951-1980 | 0.92 | 0.83 | 0.92 | 0.94 |
| 1961-1990 | 0.92 | 0.90 | 0.95 | 0.92 |
| 1971-2000 | 0.93 | 0.92 | 0.91 | 0.88 |
| 1981-2010 | 0.91 | 0.93 | 0.92 | 0.86 |
| 1991-2020 | 0.91 | 0.96 | 0.93 | 0.85 |

**Table S4.** GB<sub>2</sub> means, standard deviations (stdev) and numbers of extreme values for selected periods. Means greater than  $1\sigma$  and the highest frequencies for each period/season are emboldened.

|                  | DJF       | MAM       | JJA       | SON       |
|------------------|-----------|-----------|-----------|-----------|
| <b>1801-1850</b> |           |           |           |           |
| Mean             | 0.05      | −0.19     | 0.31      | −0.15     |
| Stdev            | 0.77      | 1.10      | 0.88      | 0.66      |
| ndays>2          | 0         | 1         | 0         | 0         |
| ndays>1.5        | 2         | 3         | 4         | 0         |
| ndays>1          | 5         | 7         | 13        | 4         |
| ndays>0.5        | <b>13</b> | 15        | <b>24</b> | 5         |
| ndays<−0.5       | 11        | <b>18</b> | 11        | <b>14</b> |
| ndays<−1         | 5         | 11        | 4         | 6         |
| ndays<−1.5       | 0         | 9         | 2         | 1         |
| ndays<−2         | 0         | 3         | 0         | 0         |
| <b>1851-1900</b> |           |           |           |           |
| Mean             | 0.14      | 0.01      | 0.15      | 0.07      |
| Stdev            | 0.94      | 1.05      | 0.88      | 0.89      |
| ndays>2          | 2         | 1         | 0         | 0         |
| ndays>1.5        | 4         | 6         | 2         | 2         |
| ndays>1          | 10        | 8         | 7         | 9         |
| ndays>0.5        | <b>19</b> | <b>16</b> | <b>21</b> | <b>14</b> |
| ndays<−0.5       | 15        | 13        | 13        | <b>14</b> |
| ndays<−1         | 6         | 8         | 6         | 6         |
| ndays<−1.5       | 1         | 5         | 1         | 3         |
| ndays<−2         | 0         | 2         | 1         | 0         |
| <b>1901-1950</b> |           |           |           |           |
| mean             | 0.06      | 0.07      | −0.03     | −0.05     |
| stdev            | 0.82      | 1.23      | 1.10      | 0.75      |
| ndays>2          | 0         | 2         | 1         | 1         |
| ndays>1.5        | 2         | 8         | 5         | 1         |
| ndays>1          | 8         | 11        | 10        | 3         |
| ndays>0.5        | <b>14</b> | <b>18</b> | 12        | 13        |
| ndays<−0.5       | 13        | 17        | <b>16</b> | <b>14</b> |
| ndays<−1         | 6         | 11        | 12        | 4         |
| ndays<−1.5       | 1         | 7         | 6         | 1         |
| ndays<−2         | 0         | 2         | 1         | 1         |
| <b>1951-2000</b> |           |           |           |           |
| mean             | 0.00      | 0.00      | 0.00      | 0.00      |
| stdev            | 1.00      | 1.00      | 1.00      | 1.00      |
| ndays>2          | 2         | 0         | 0         | 2         |
| ndays>1.5        | 3         | 2         | 2         | 4         |
| ndays>1          | 8         | 10        | 9         | 7         |
| ndays>0.5        | 14        | <b>18</b> | <b>18</b> | <b>16</b> |
| ndays<−0.5       | <b>19</b> | 16        | 17        | 15        |
| ndays<−1         | 10        | 9         | 10        | 8         |
| ndays<−1.5       | 2         | 3         | 3         | 5         |
| ndays<−2         | 0         | 1         | 1         | 0         |
| <b>2000-2020</b> |           |           |           |           |
| mean             | −0.34     | −0.16     | 0.81      | −0.31     |
| stdev            | 0.99      | 1.30      | 1.46      | 0.98      |
| ndays>2          | 0         | 0         | 4         | 0         |
| ndays>1.5        | 1         | 2         | 9         | 2         |
| ndays>1          | 1         | 5         | 10        | 3         |
| ndays>0.5        | 4         | 6         | <b>12</b> | 4         |
| ndays<−0.5       | <b>10</b> | <b>8</b>  | 3         | <b>9</b>  |
| ndays<−1         | 6         | 4         | 2         | 6         |

|                  |          |          |             |          |
|------------------|----------|----------|-------------|----------|
| ndays<-1.5       | 2        | 3        | 2           | 3        |
| ndays<-2         | 0        | 2        | 1           | 0        |
| <b>2007-2020</b> |          |          |             |          |
| mean             | −0.43    | −0.40    | <b>1.18</b> | −0.61    |
| stdev            | 1.14     | 1.36     | 1.64        | 0.99     |
| ndays>2          | 0        | 0        | 4           | 0        |
| ndays>1.5        | 1        | 1        | 9           | 1        |
| ndays>1          | 1        | 2        | <b>10</b>   | 2        |
| ndays>0.5        | 3        | 3        | <b>10</b>   | 2        |
| ndays<-0.5       | <b>7</b> | <b>6</b> | 2           | <b>9</b> |
| ndays<-1         | 6        | 4        | 2           | 6        |
| ndays<-1.5       | 2        | 3        | 2           | 3        |
| ndays<-2         | 0        | 2        | 1           | 0        |

**Table S5.** NAO<sub>Fixed</sub> means, standard deviations (stdev) and numbers of extreme values for selected periods. Means greater than  $1\sigma$  and the highest frequencies for each period/season are emboldened.

|                  | <b>DJF</b> | <b>MAM</b> | <b>JJA</b> | <b>SON</b> |
|------------------|------------|------------|------------|------------|
| <b>1801-1850</b> |            |            |            |            |
| mean             | −0.18      | 0.00       | −0.71      | −0.19      |
| stdev            | 1.27       | 1.49       | 1.24       | 1.20       |
| ndays>2          | 1          | 6          | 0          | 3          |
| ndays>1.5        | 5          | 12         | 1          | 5          |
| ndays>1          | 9          | 13         | 2          | 11         |
| ndays>0.5        | 18         | 16         | 7          | 14         |
| ndays<-0.5       | <b>21</b>  | <b>18</b>  | <b>25</b>  | <b>22</b>  |
| ndays<-1         | 12         | 12         | 18         | 12         |
| ndays<-1.5       | 7          | 9          | 9          | 6          |
| ndays<-2         | 6          | 6          | 8          | 2          |
| <b>1851-1900</b> |            |            |            |            |
| mean             | −0.36      | −0.30      | −0.26      | −0.31      |
| stdev            | 1.60       | 1.81       | 1.34       | 1.78       |
| ndays>2          | 2          | 5          | 3          | 5          |
| ndays>1.5        | 7          | 7          | 5          | 8          |
| ndays>1          | 8          | 13         | 8          | 11         |
| ndays>0.5        | 18         | 17         | 12         | 18         |
| ndays<-0.5       | <b>22</b>  | <b>24</b>  | <b>22</b>  | <b>25</b>  |
| ndays<-1         | 16         | 18         | 15         | 18         |
| ndays<-1.5       | 12         | 13         | 10         | 12         |
| ndays<-2         | 6          | 9          | 3          | 7          |
| <b>1901-1950</b> |            |            |            |            |
| mean             | 0.12       | 0.13       | −0.17      | −0.03      |
| stdev            | 1.52       | 0.87       | 1.65       | 1.71       |
| ndays>2          | 4          | 7          | 4          | 8          |
| ndays>1.5        | 6          | 11         | 6          | 10         |
| ndays>1          | 18         | 17         | 14         | 16         |
| ndays>0.5        | <b>26</b>  | <b>22</b>  | 19         | 16         |
| ndays<-0.5       | 15         | 16         | <b>20</b>  | <b>20</b>  |
| ndays<-1         | 13         | 15         | 14         | 14         |
| ndays<-1.5       | 10         | 13         | 9          | 11         |
| ndays<-2         | 6          | 8          | 9          | 7          |
| <b>1951-2000</b> |            |            |            |            |
| mean             | 0.00       | 0.00       | 0.00       | 0.00       |
| stdev            | 1.84       | 1.78       | 1.58       | 1.76       |
| ndays>2          | 7          | 8          | 4          | 7          |
| ndays>1.5        | 14         | 11         | 9          | 10         |
| ndays>1          | 18         | 12         | 16         | 18         |

|                  |           |           |           |           |
|------------------|-----------|-----------|-----------|-----------|
| ndays>0.5        | <b>23</b> | 16        | 20        | <b>24</b> |
| ndays<-0.5       | 22        | <b>19</b> | <b>22</b> | 20        |
| ndays<-1         | 16        | 15        | 13        | 16        |
| ndays<-1.5       | 11        | 11        | 8         | 12        |
| ndays<-2         | 7         | 4         | 7         | 7         |
| <b>2000-2020</b> |           |           |           |           |
| mean             | 0.67      | 0.13      | −0.71     | 0.21      |
| stdev            | 2.00      | 2.11      | 1.73      | 1.50      |
| ndays>2          | 5         | 6         | 1         | 4         |
| ndays>1.5        | 7         | 6         | 4         | 5         |
| ndays>1          | 10        | 8         | 4         | 5         |
| ndays>0.5        | <b>12</b> | <b>9</b>  | 4         | <b>9</b>  |
| ndays<-0.5       | 5         | <b>9</b>  | <b>13</b> | 6         |
| ndays<-1         | 4         | 6         | 9         | 4         |
| ndays<-1.5       | 2         | 5         | 6         | 2         |
| ndays<-2         | 1         | 3         | 5         | 1         |
| <b>2007-2020</b> |           |           |           |           |
| mean             | 0.98      | 0.41      | −0.84     | 0.48      |
| stdev            | 2.22      | 2.13      | 1.87      | 1.42      |
| ndays>2          | 4         | 4         | 0         | 3         |
| ndays>1.5        | 6         | 4         | 3         | 4         |
| ndays>1          | 8         | 6         | 3         | 4         |
| ndays>0.5        | <b>10</b> | <b>7</b>  | 3         | <b>7</b>  |
| ndays<-0.5       | 2         | 5         | <b>9</b>  | 3         |
| ndays<-1         | 2         | 3         | 6         | 2         |
| ndays<-1.5       | 2         | 3         | 5         | 1         |
| ndays<-2         | 1         | 2         | 4         | 0         |

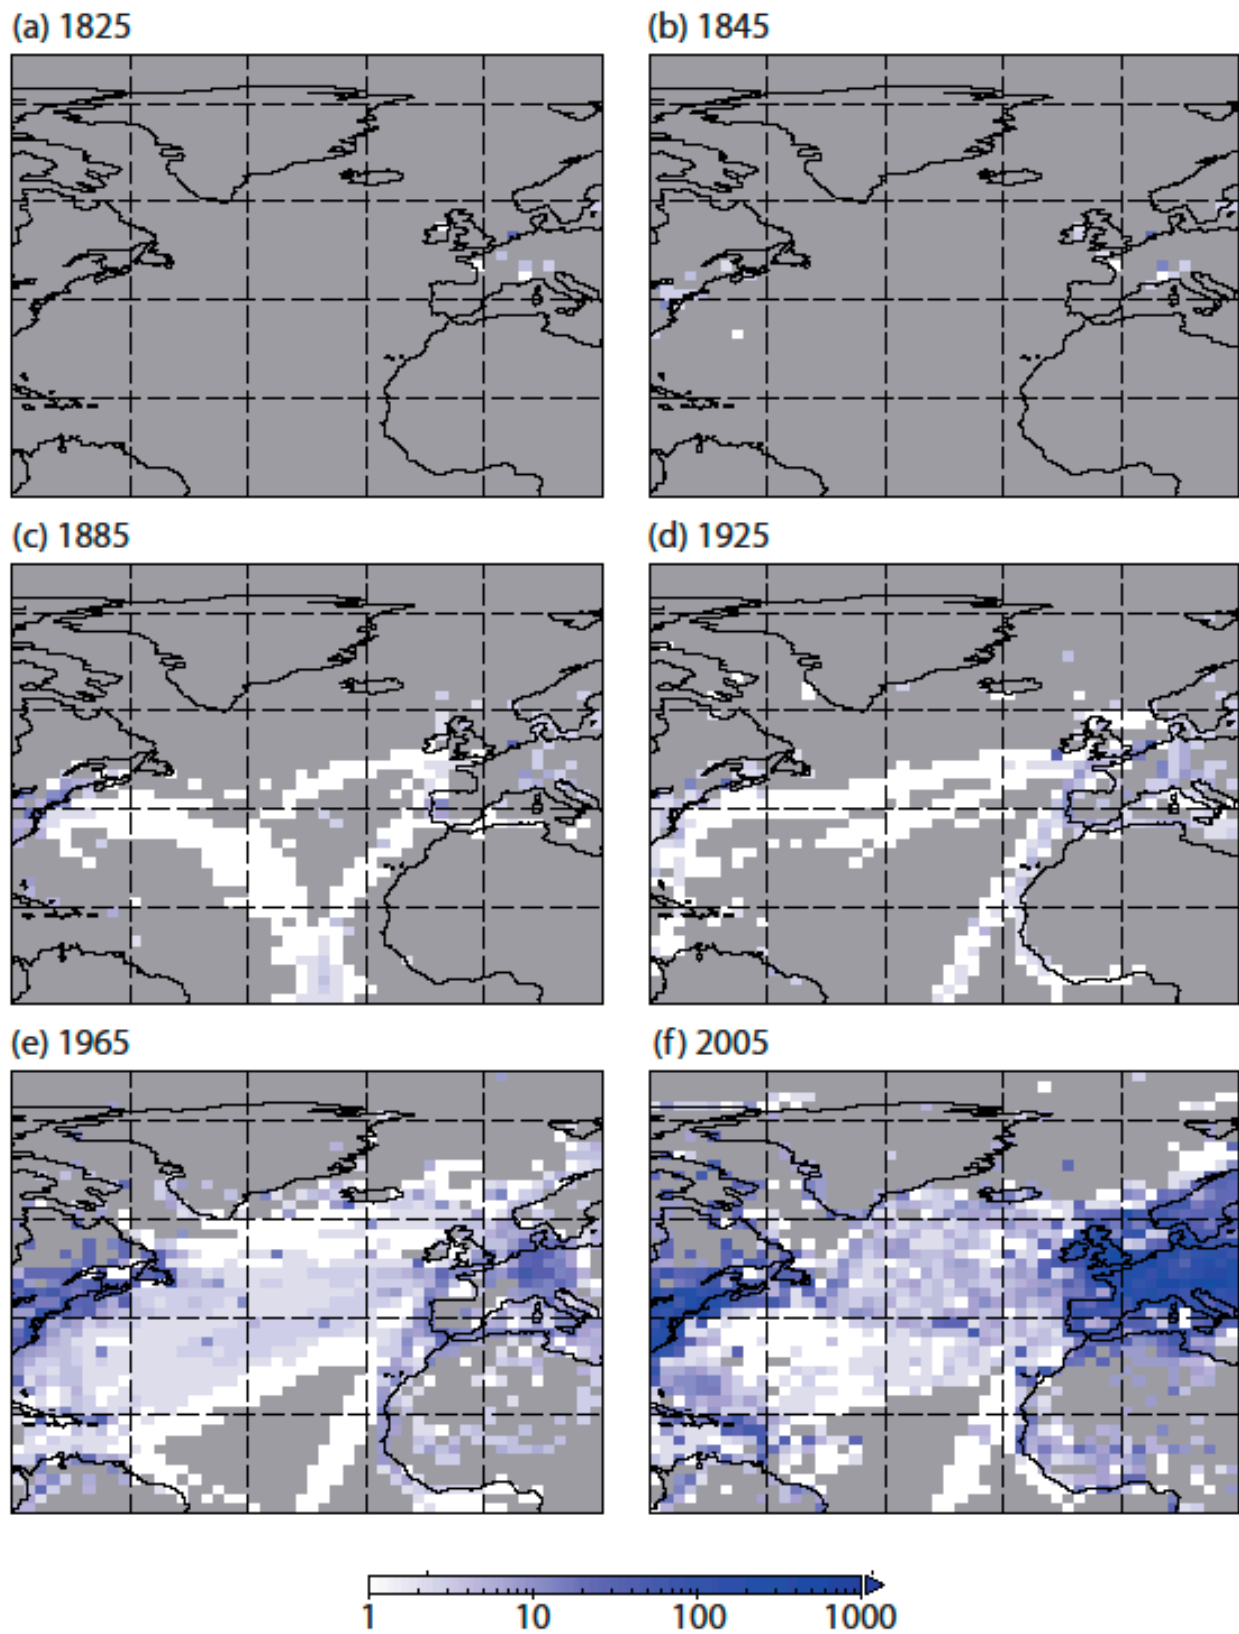

mean daily observation count per 2° x 2° grid square

Figure S1. ISPD observational coverage for selected years in 20CRv3.

(a) DJF

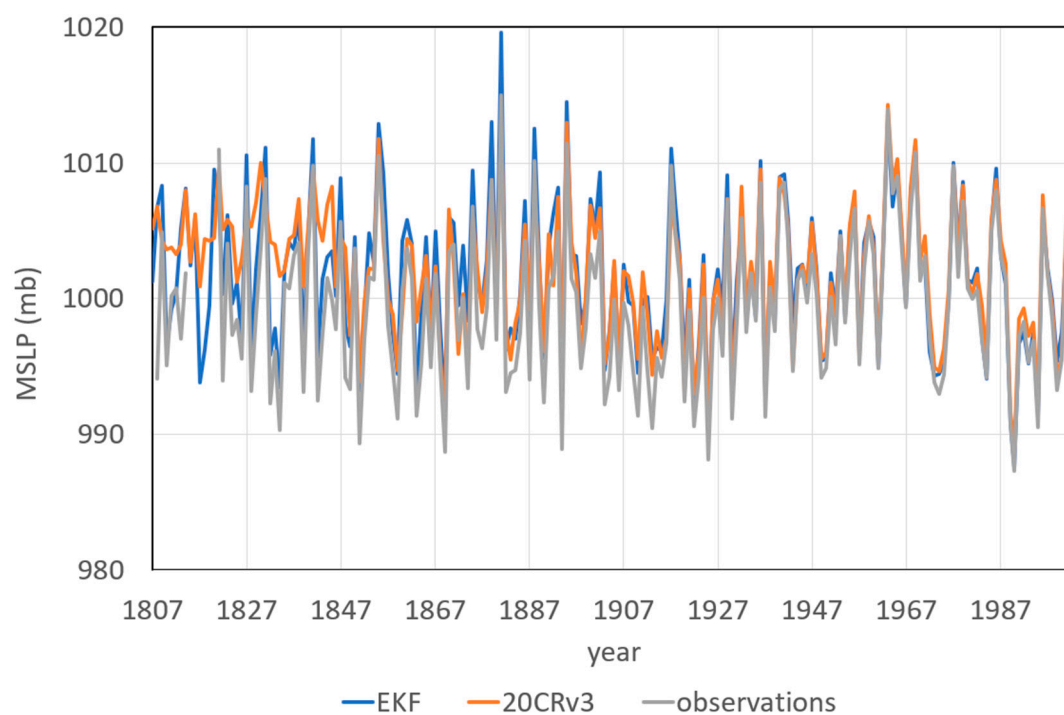

(b) MAM

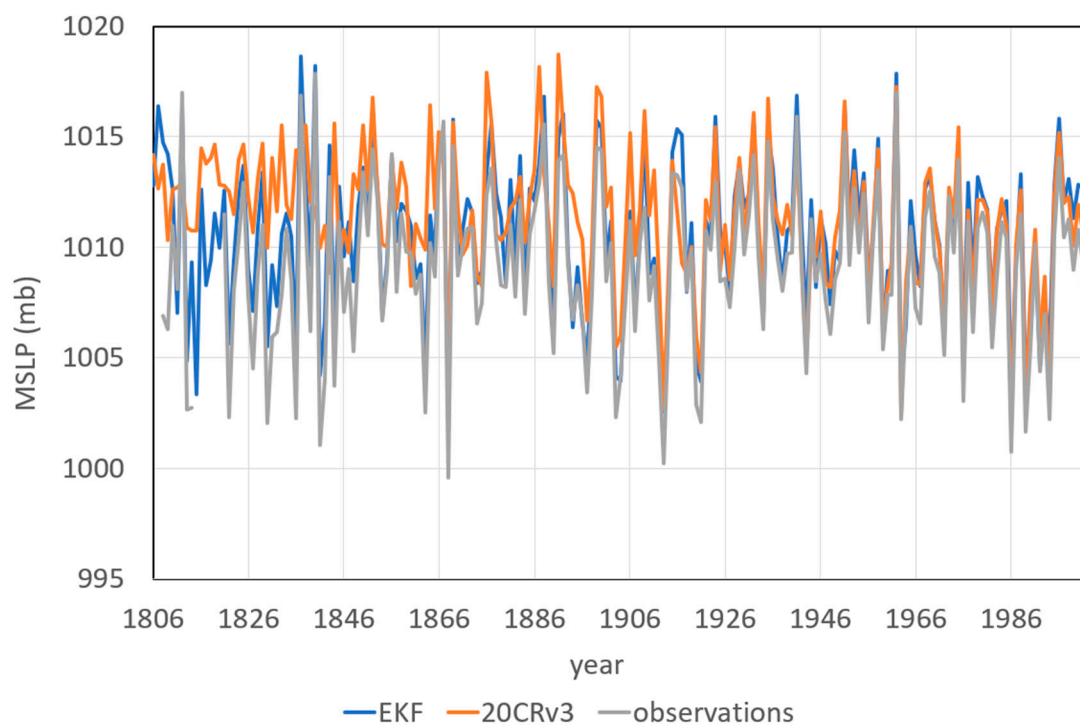

(c) JJA

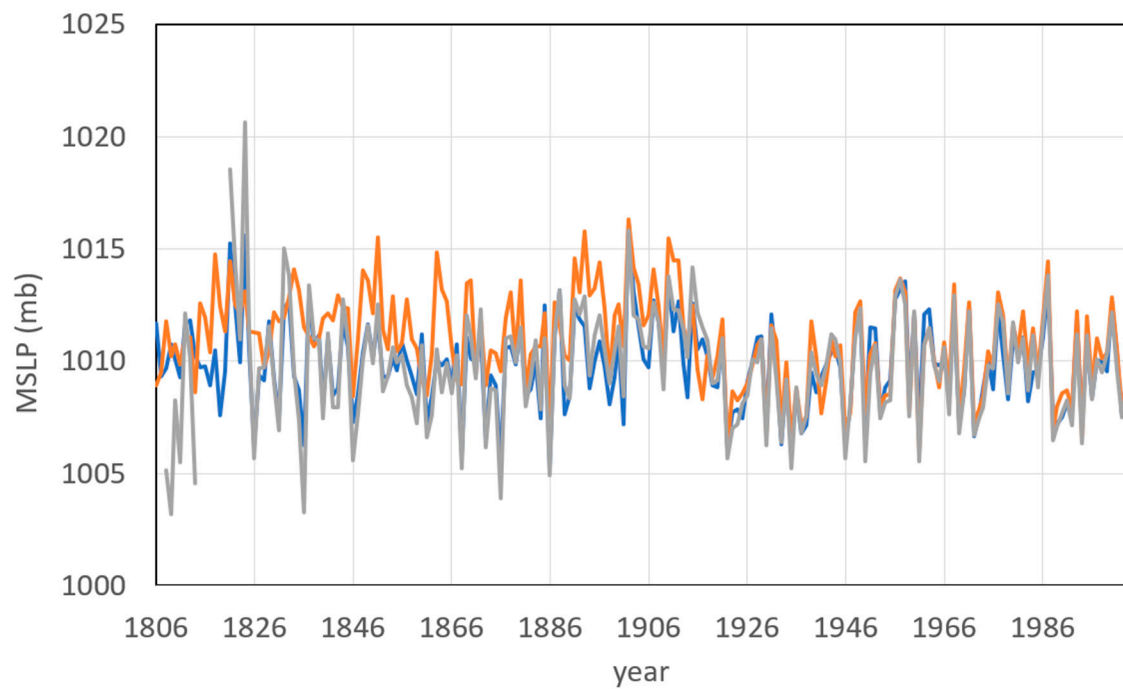

—EKF —20CRv3 —observations  
(d) SON

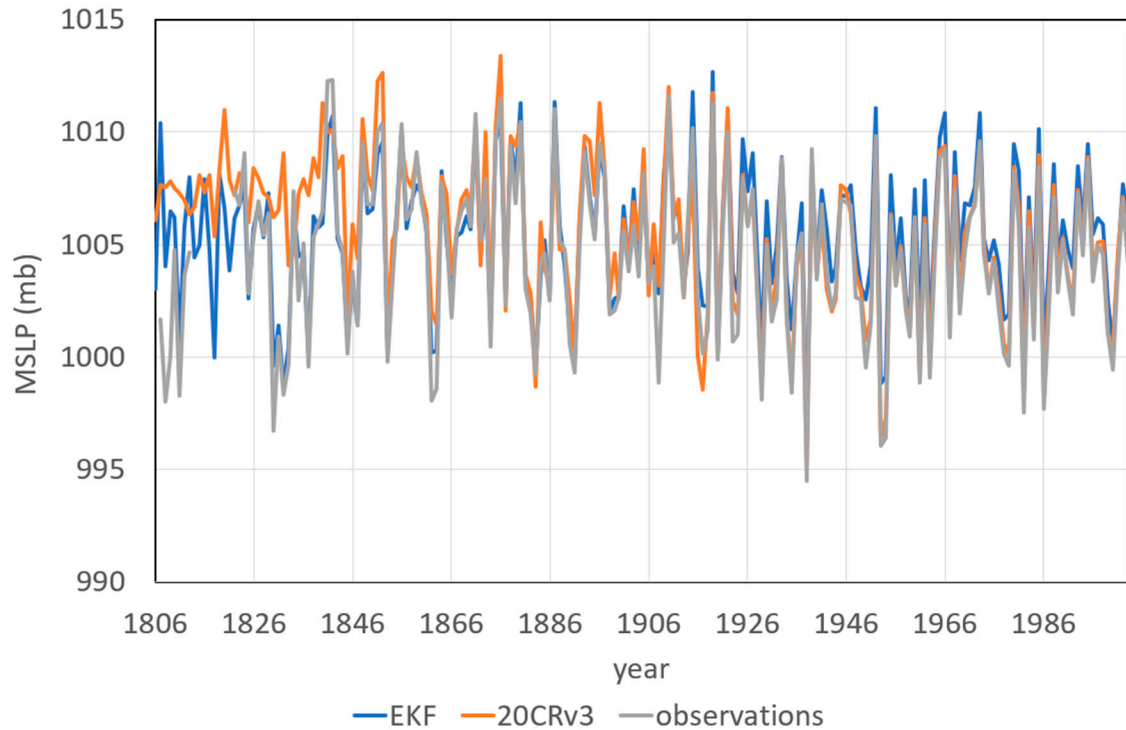

—EKF —20CRv3 —observations

**Figure S2.** Seasonal time series of SW Iceland mean sea-level pressure (MSLP) from extended weather station record (grey) and 20CRv3 (orange) and EKF400v2 (blue) reanalyses: (a) winter; (b) spring; (c) summer; (d) autumn.

(a) DJF

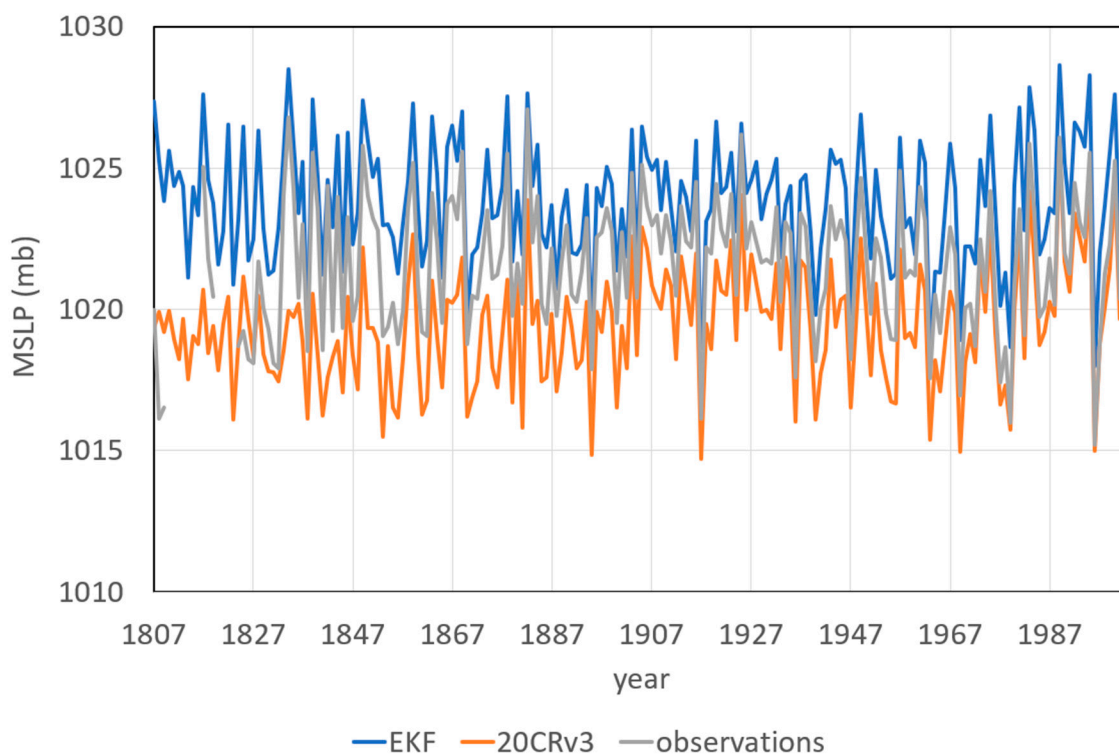

(b) MAM

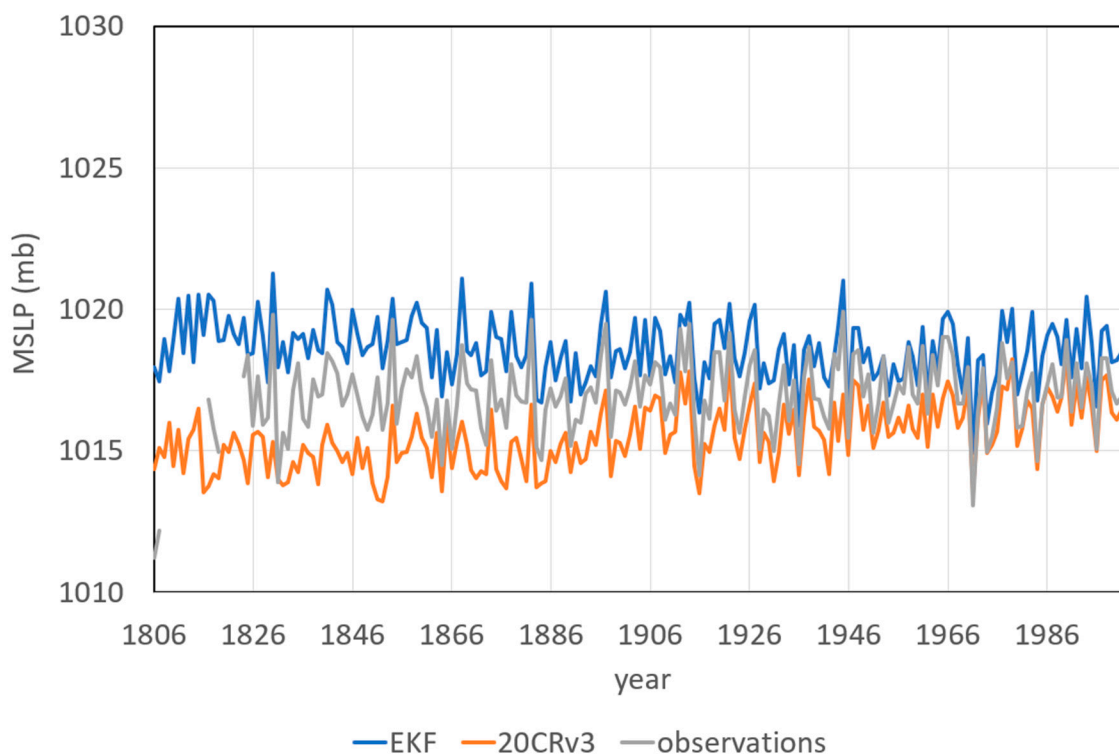

(c) JJA.



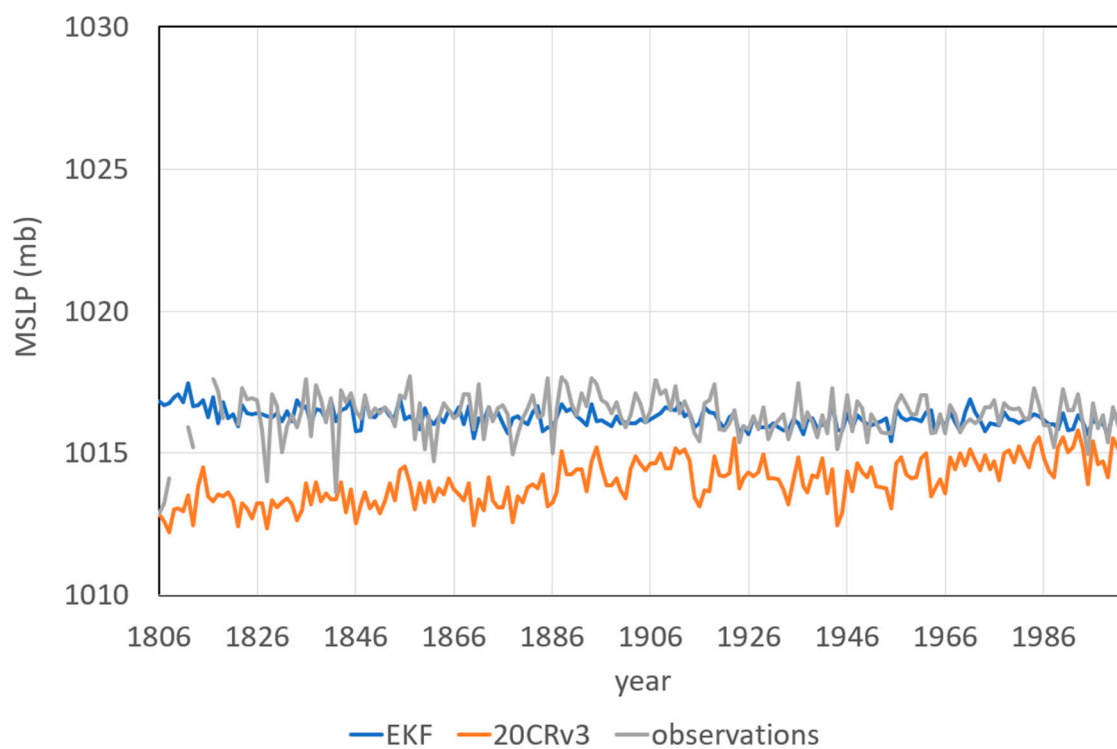

(d) SON

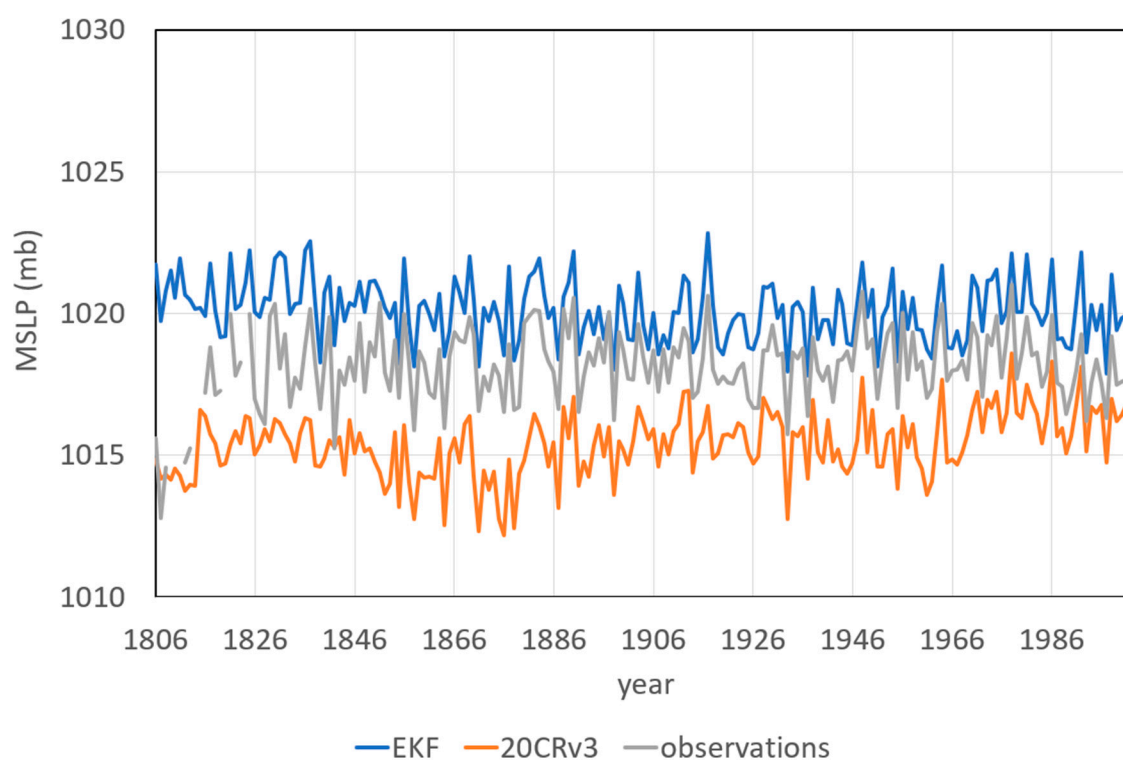

(a) DJF

**Figure S3.** Seasonal time series of Gibraltar mean sea-level pressure (MSLP) from extended weather station record (grey) and 20CRv3 (orange) and EKF400v2 (blue) reanalyses: (a) winter; (b) spring; (c) summer; (d) autumn.

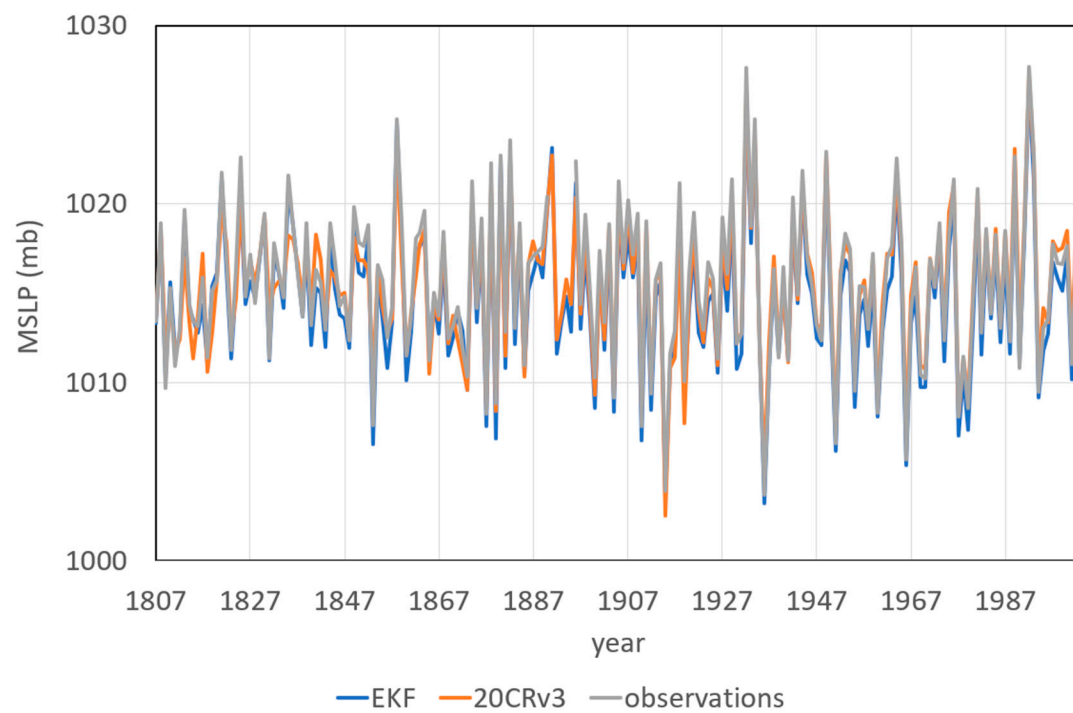

(b) MAM

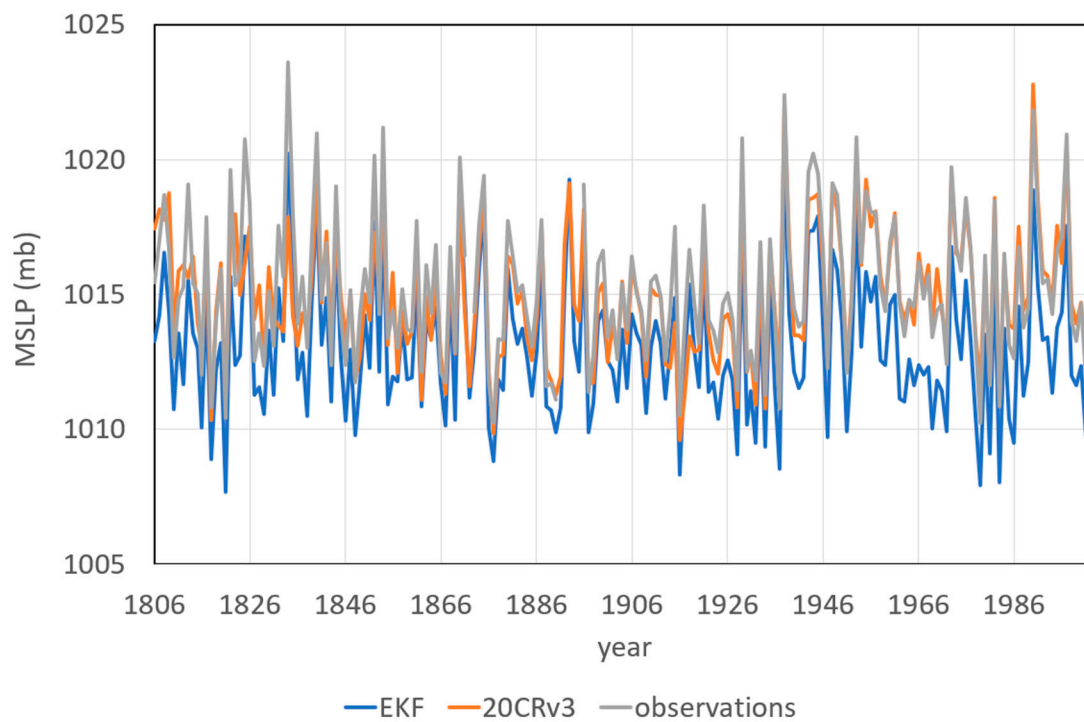

(c) JJA

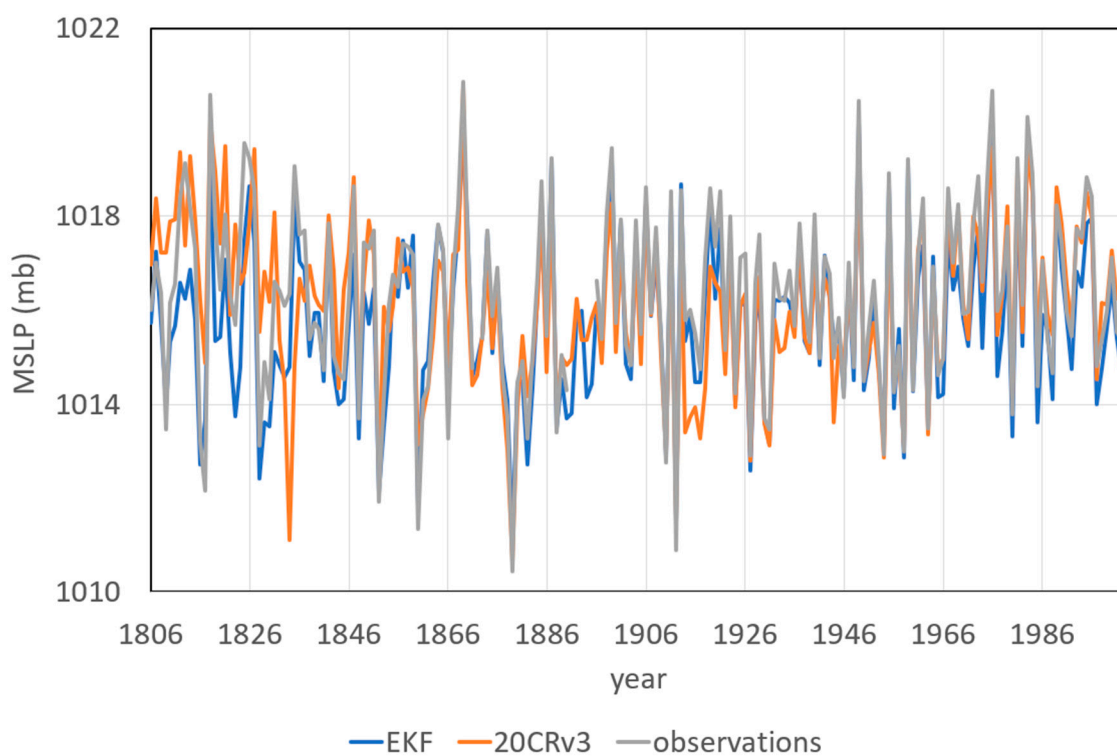

(d) SON

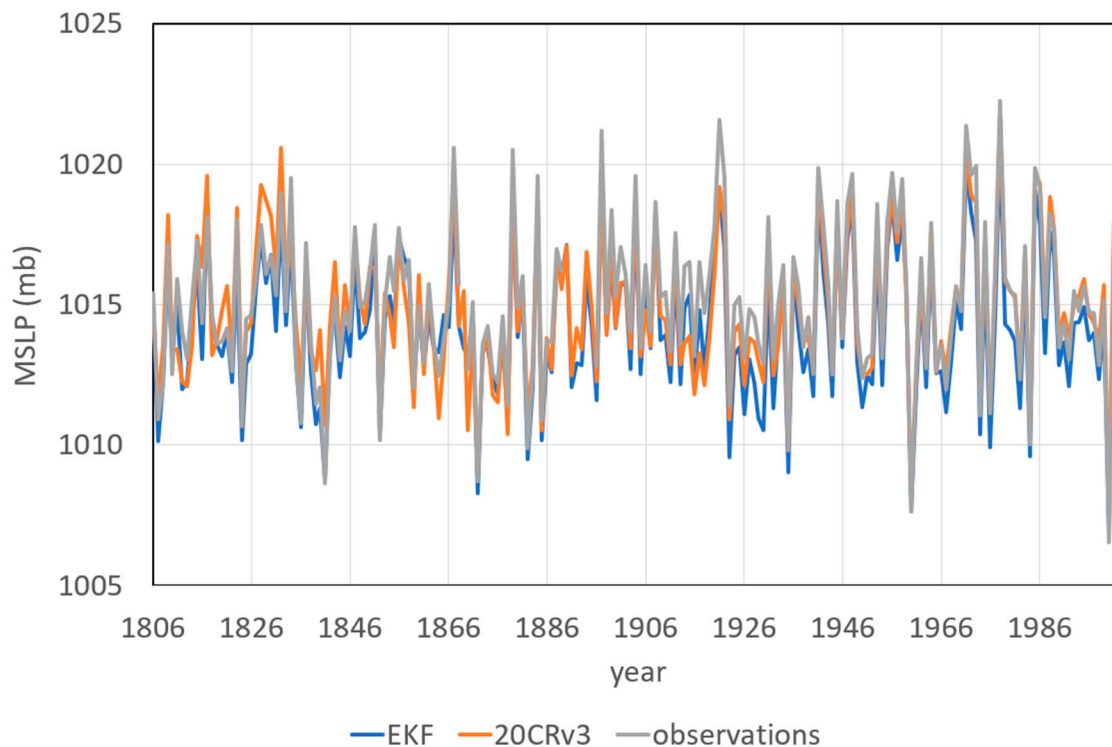

**Figure S4.** Seasonal time series of London mean sea-level pressure (MSLP) from extended weather station record (grey) and 20CRv3 (orange) and EKF400v2 (blue) reanalyses: (a) winter; (b) spring; (c) summer; (d) autumn.

(a) DJF

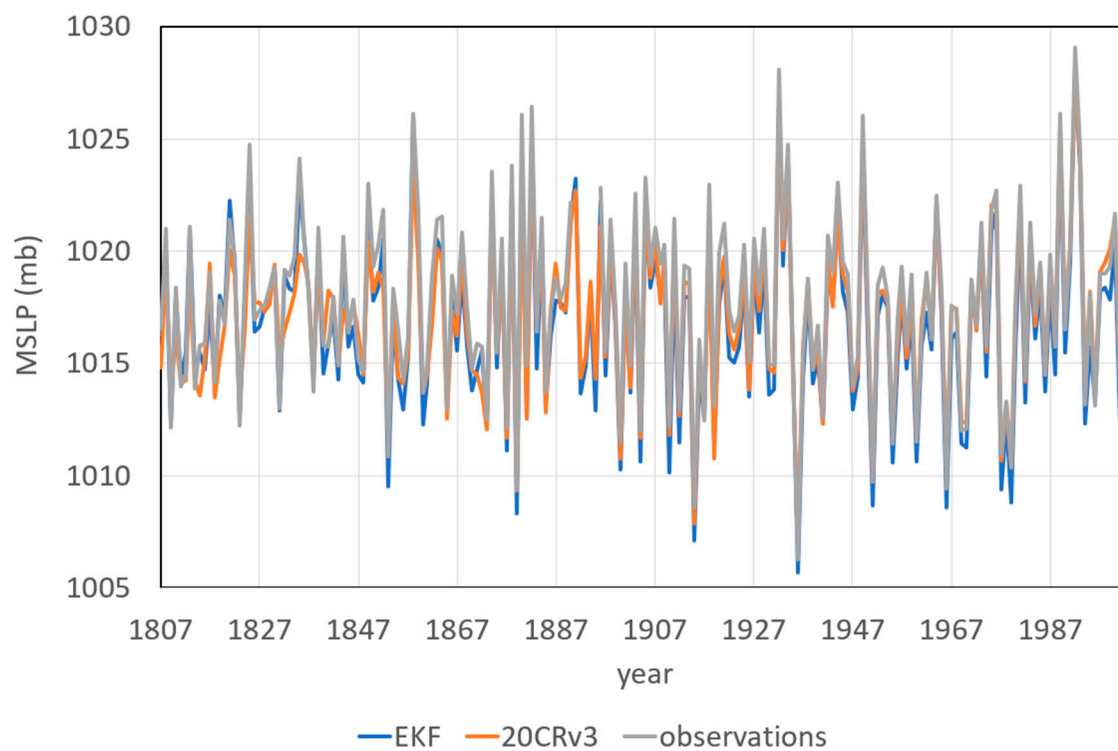

(b) MAM

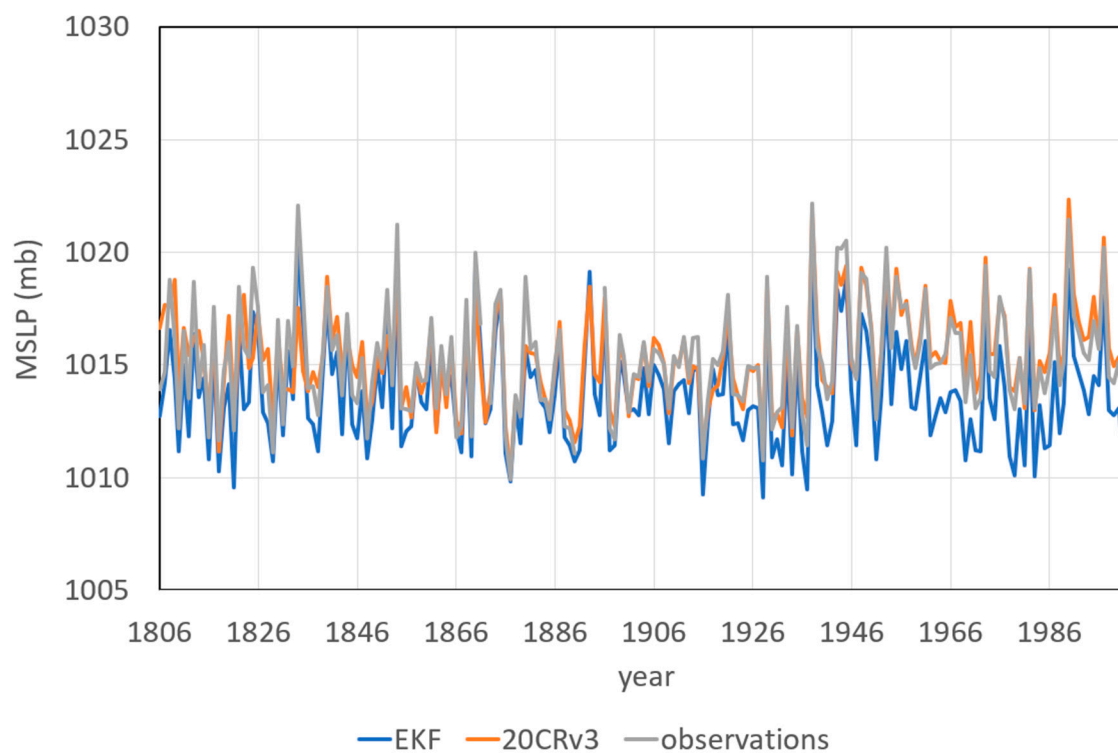

(c) JJA

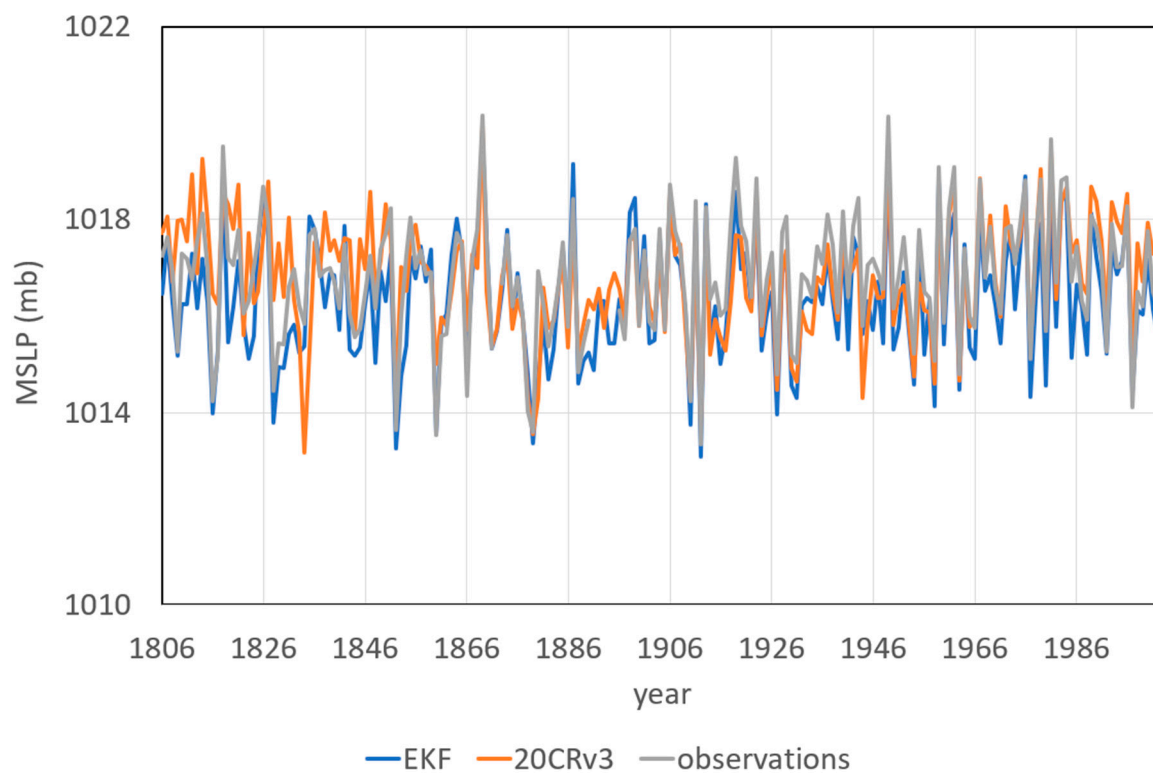

(c) JJA

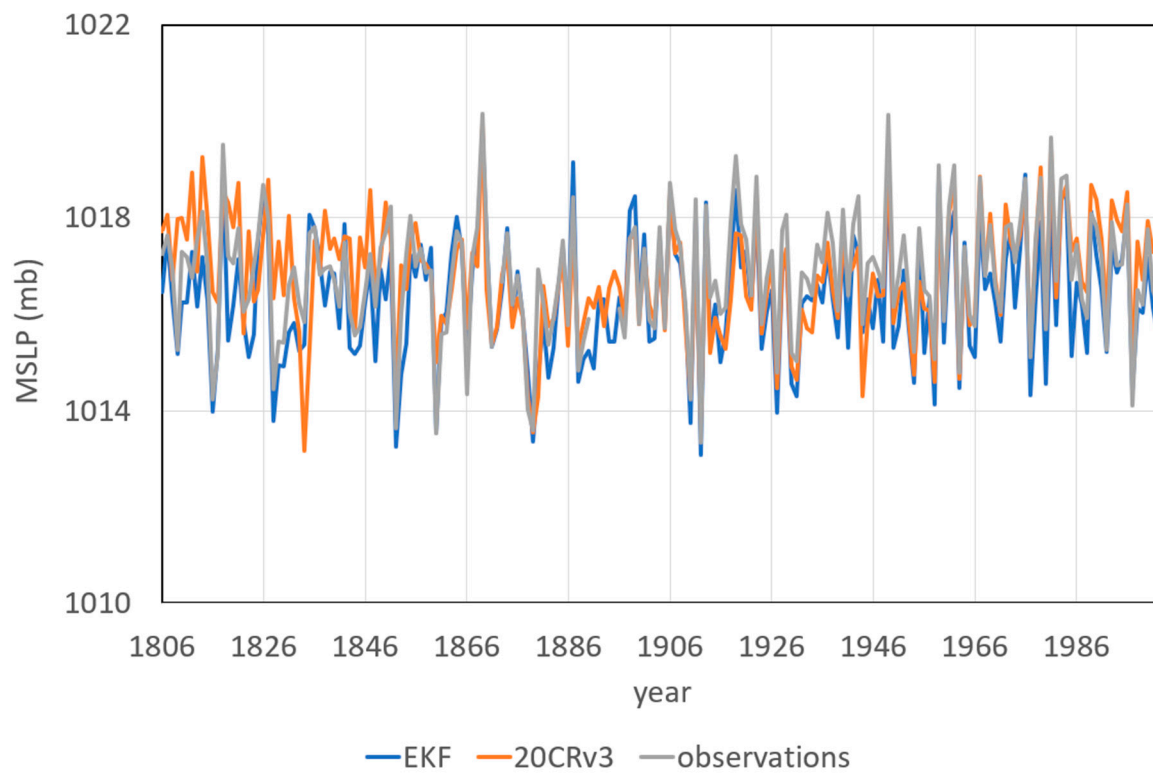

(d) SON

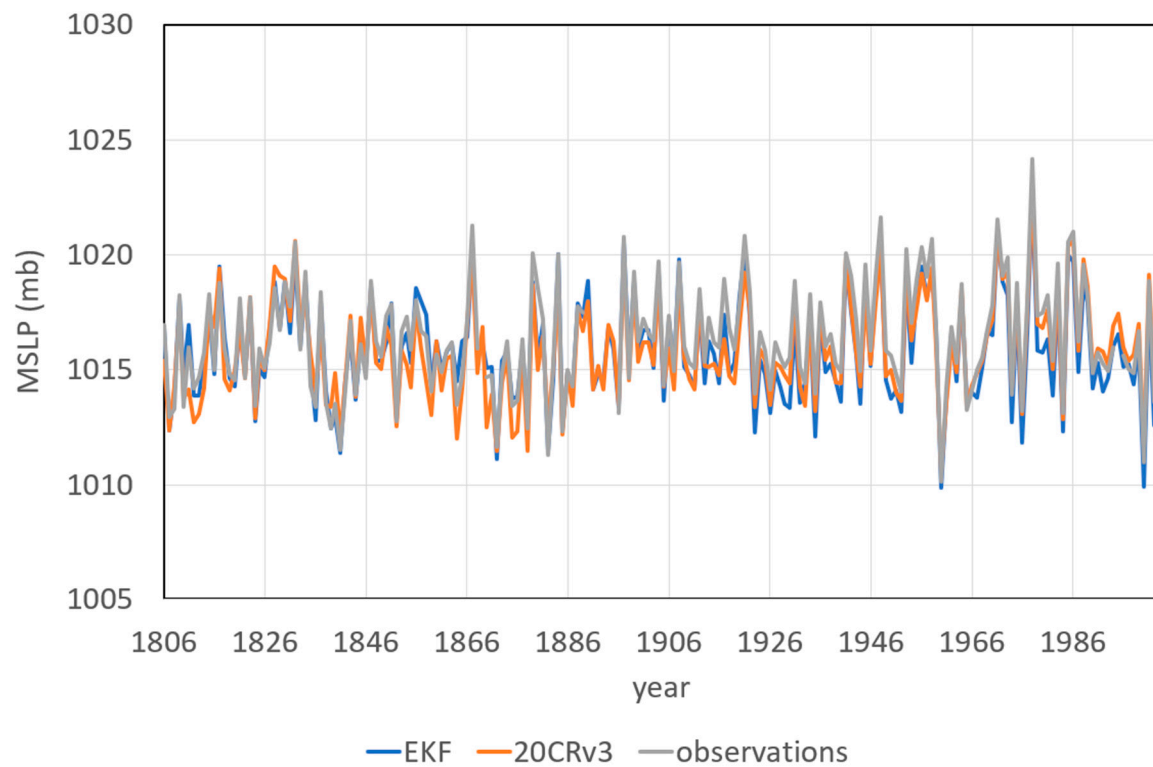

**Figure S5.** Seasonal time series of Paris mean sea-level pressure (MSLP) from extended weather station record (grey) and 20CRv3 (orange) and EKF400v2 (blue) reanalyses: (a) winter; (b) spring; (c) summer; (d) autumn.
